# Supplementary material
Source: PubMed Central journal article supplement (PMC3877802)
Supplement: supp_tpc.113.117051_tpc117051_Supplemental_Data.pdf [file supp_tpc.113.117051_tpc117051_Supplemental_Data.pdf]

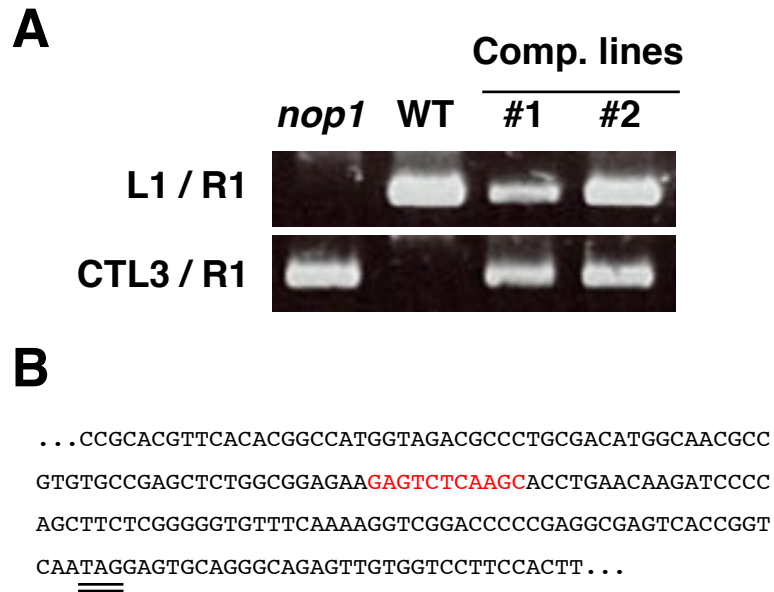

**Supplemental Figure 1. Molecular Characterization of the T-DNA Insertion Site of *nop1*.**

(A) Genomic PCR analyses of wild type, *nop1*, and the complemented lines, with the primer sets indicated on the left. The positions of the primers in the *NOP1* genomic locus are represented in Figure 4A.

(B) Sequence of the T-DNA insertion site in *NOP1* gene. The 11-bp sequence indicated in red near the stop codon in *NOP1* coding region was deleted and replaced with T-DNA in *nop1*. Double underline shows the stop codon of *NOP1* gene.

Supplemental Data. Ishizaki et al. (2013). Plant Cell 10.1105/tpc.113.117051.

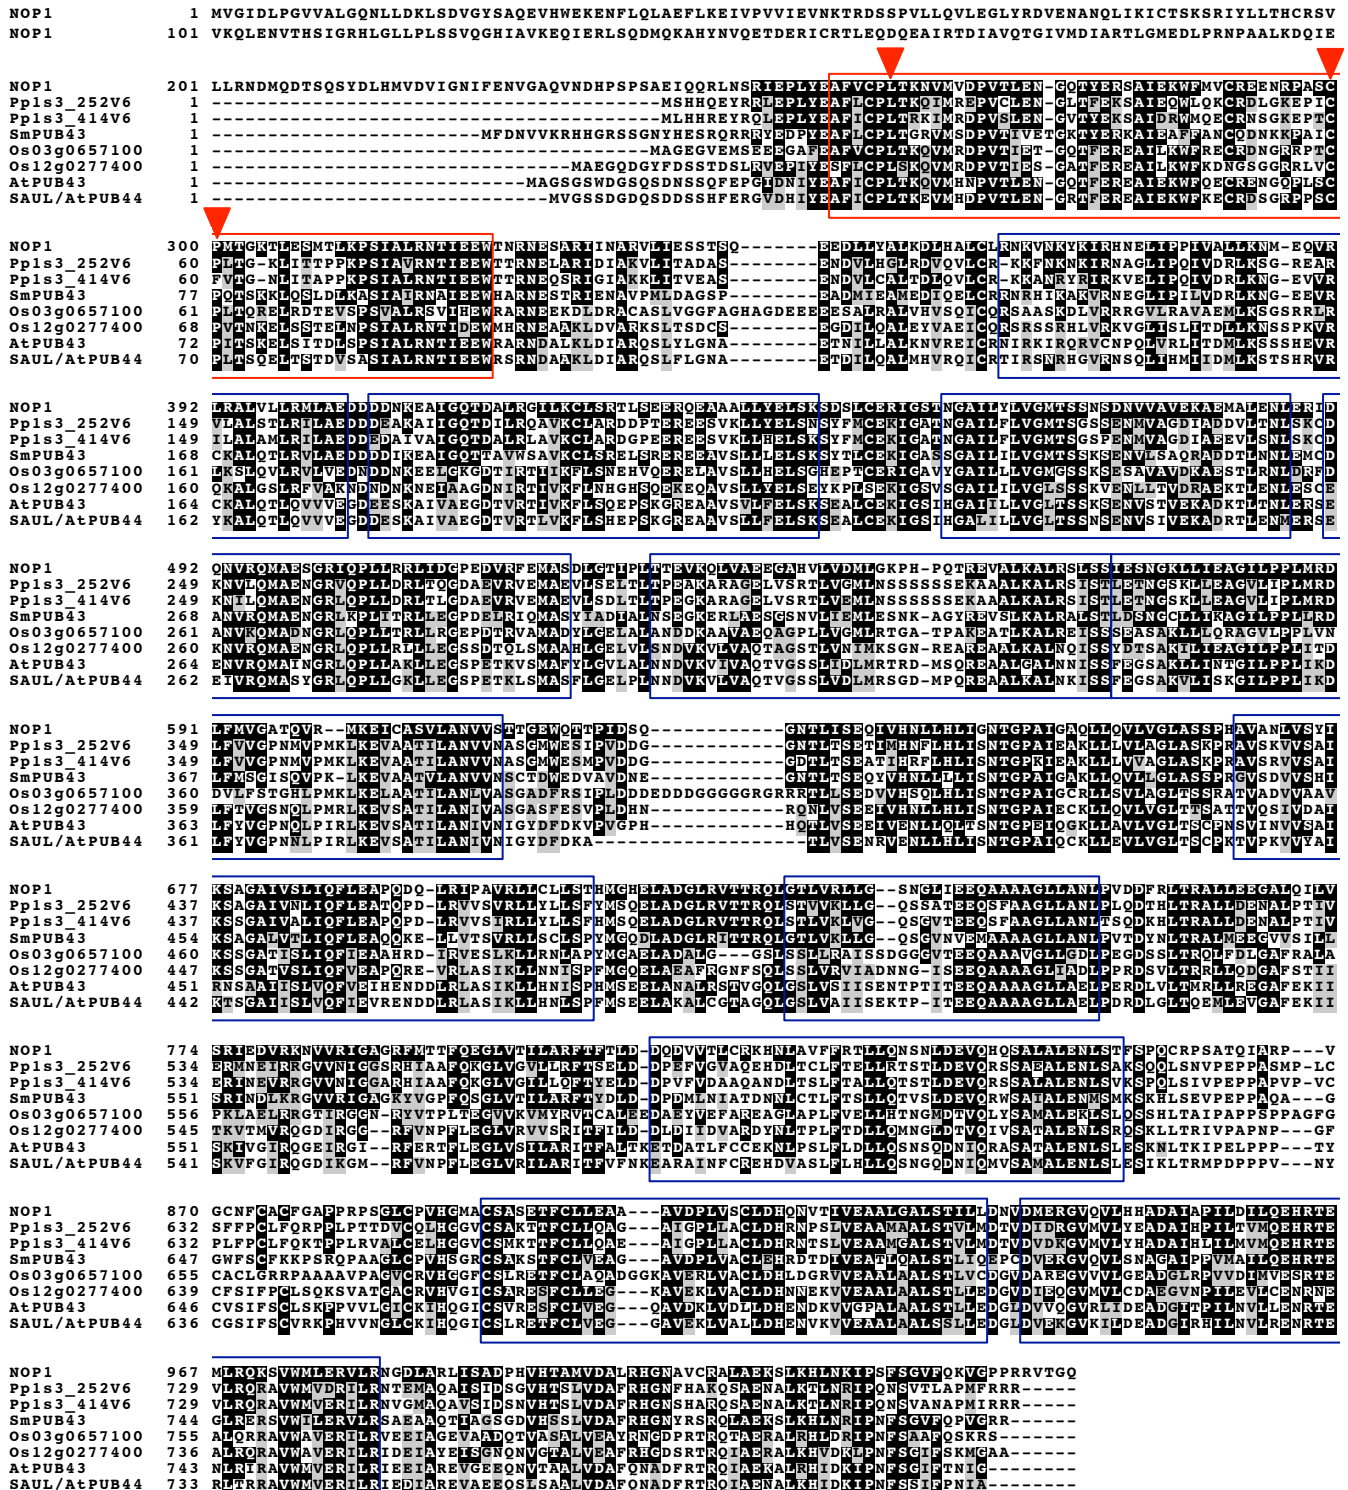

**Supplemental Figure 2. Amino Acid Sequence Alignment of NOP1 and Seven Other PUB-ARM Proteins.** Red box indicates U-box domain. Blue boxes indicate armadillo repeats detected using SMART, a simple modular architecture research tool (<http://smart.embl-heidelberg.de>). Residues identical or similar to those of NOP1 are shown in black or gray shading, respectively. Red arrow heads indicate amino acid residues mutated in NOP1 E3 ligase activity assay shown in Figure 5.

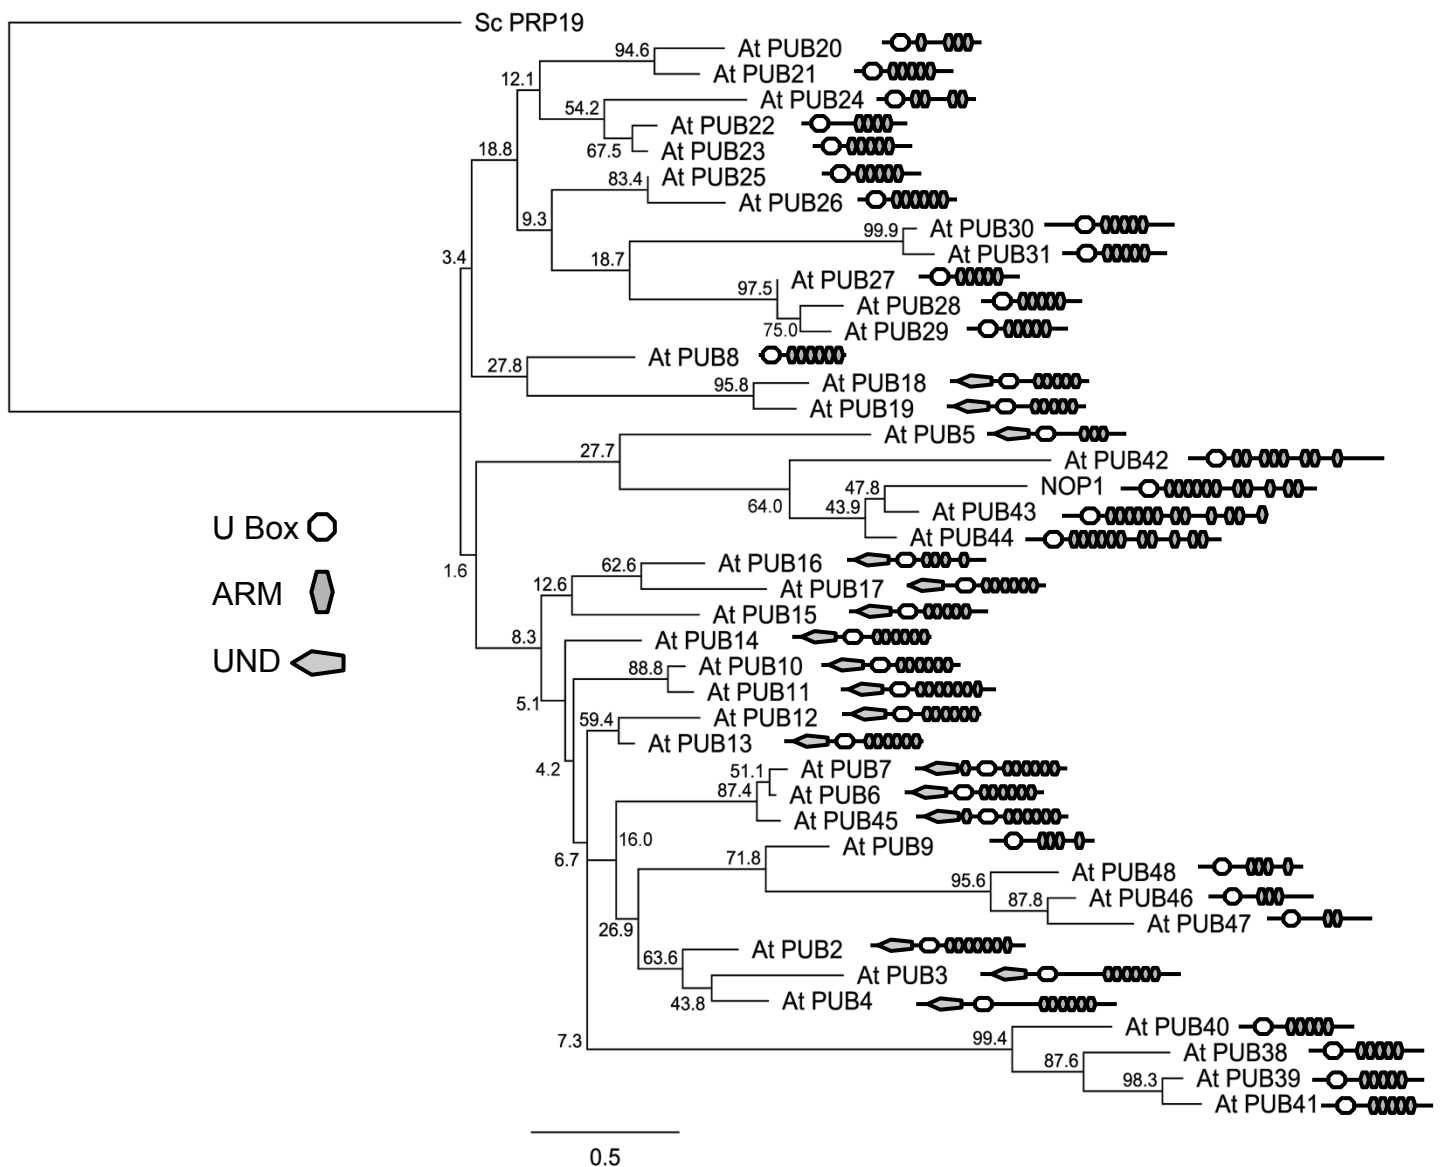

### Supplemental Figure 3. Phylogeny of NOP1 and the Arabidopsis PUB-ARM proteins.

The tree was constructed with phyML (Guindon and Gascuel, 2000) (<https://code.google.com/p/phyml/>) using maximum-likelihood principle, on the basis of the multiple alignment of the U-box domains (see Supplemental Data Set 1 online). The U-box domains of NOP1, the 41 Arabidopsis PUB-ARM proteins, and PRP19 (YLL036C) from *Saccharomyces cerevisiae* were analyzed. The 41 Arabidopsis PUB-ARM proteins are as follows: At5g67340 (At PUB2), At3g54790 (At PUB3), At2g23140 (At PUB4), At4g36550 (At PUB5), At1g24330 (At PUB6), At1g67530 (At PUB7), At4g21350 (At PUB8), At3g07360 (At PUB9), At1g71020 (At PUB10), At1g23030 (At PUB11), At2g28830 (At PUB12), At3g46510 (At PUB13), At3g54850 (At PUB14), At5g42340 (At PUB15), At5g01830 (At PUB16), At1g29340 (At PUB17), At1g10560 (At PUB18), At1g60190 (At PUB19), At1g66160 (At PUB20), At5g37490 (At PUB21), At3g52450 (At PUB22), At2g35930 (At PUB23), At3g11840 (At PUB24), At3g19380 (At PUB25), At1g49780 (At PUB26), At5g64660 (At PUB27), At5g09800 (At PUB28), At3g18710 (At PUB29), At3g49810 (At PUB30), At5g65920 (At PUB31), At5g65200 (At PUB38), At3g47820 (At PUB39), At5g40140 (At PUB40), At5g62560 (At PUB41), At1g68940 (At PUB42), At1g76390 (At PUB43), At1g20780 (At PUB44), At1g27910 (At PUB45), At5g18320 (At PUB46), At5g18330 (At PUB47), At5g18340 (At PUB48). Number of bootstrap trials is 2000. Bootstrap values of key nodes are shown at respective nodes as percentages. Scale bar indicates number of amino acid changes per branch length.

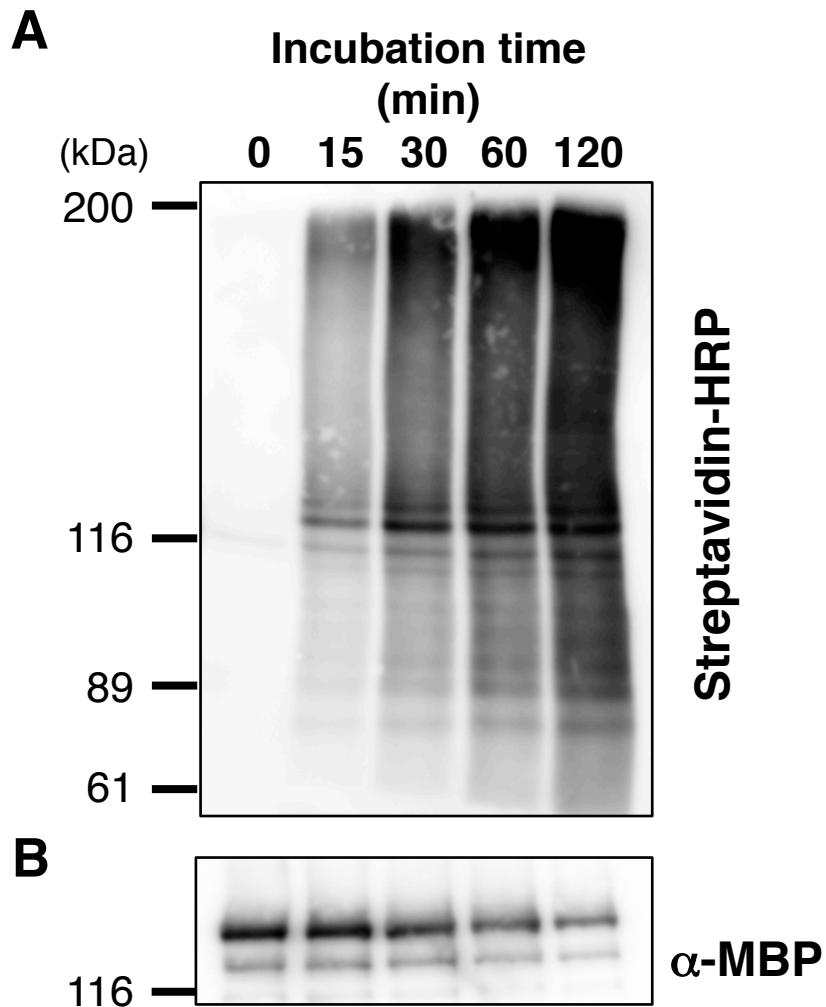

**Supplemental Figure 4. Time-Dependent Assay of an *In Vitro* Ubiquitination of NOP1 Protein.**

MBP-NOP1 was incubated with E1, E2, biotin-Ub, and ATP for 0, 15, 30, 60, and 120 min and then subjected to Western blot analysis with streptavidin-HRP (top) or anti-MBP antibodies (bottom).

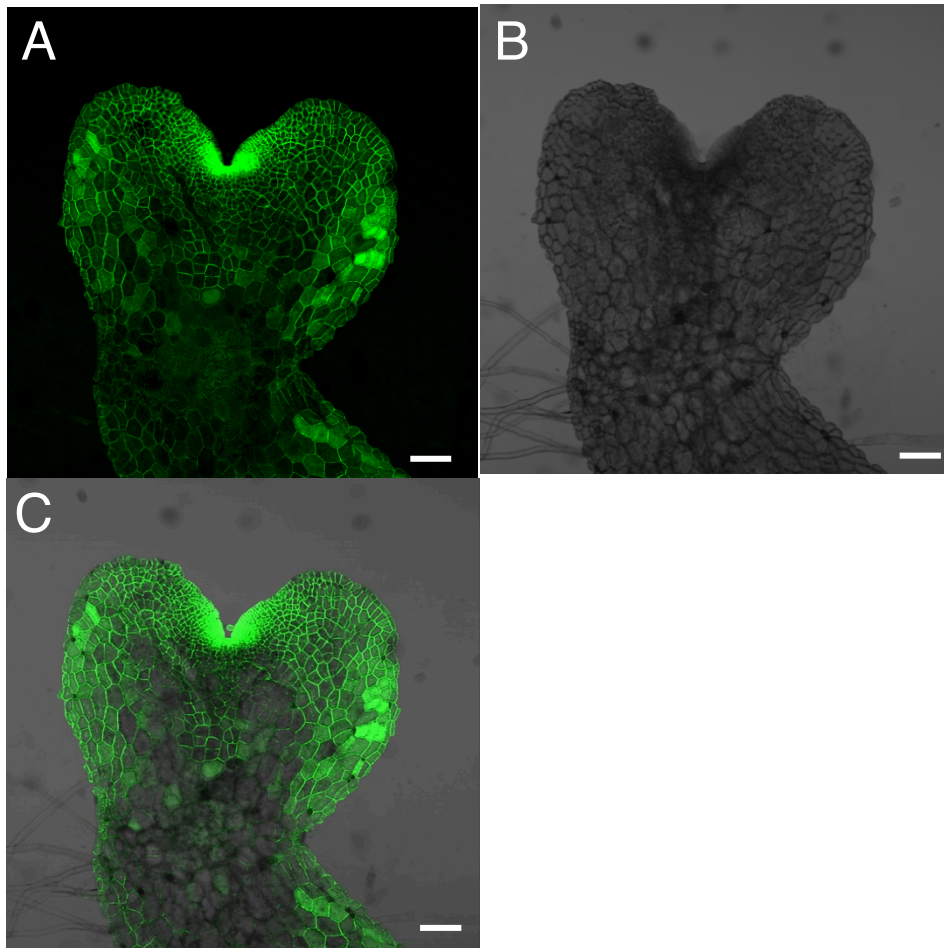

**Supplemental Figure 5. Expression of *NOP1* Gene in Developing Thallus.**

**(A-C)** Z-stack images of optical serial sections. Optical serial sections through 3-day-old *gNOP1-Citrine/nop1* #1 thallus. Sections were taken from ventral to dorsal region in 0.5  $\mu\text{m}$  slices. Panels show Citrine fluorescence **(A)**, bright-field **(B)** and merged images **(C)**. Scale bars : 100 $\mu\text{m}$ .

### Supplemental Table 1. Cycle Settings Used for TAIL-PCR

| Reaction  | Cycle no. | Thermal settings                                                |                                         |
|-----------|-----------|-----------------------------------------------------------------|-----------------------------------------|
| Primary   | 1         | 94°C, 30 sec, 95°C, 15 sec                                      |                                         |
|           | 5         | 94°C, 15 sec, 65°C, 30 sec, 68°C, 3 min                         |                                         |
|           | 2         | 94°C, 15 sec, 30°C, 1 min, (3 min ramping to 68°C), 68°C, 3 min |                                         |
|           | 15        |                                                                 | 94°C, 15 sec, 64°C, 30 sec, 68°C, 3 min |
|           |           |                                                                 | 94°C, 15 sec, 64°C, 30 sec, 68°C, 3 min |
|           |           |                                                                 | 94°C, 15 sec, 44°C, 30 sec, 68°C, 3 min |
|           | 1         | 68°C, 5 min                                                     |                                         |
| Secondary | 1         | 94°C, 30 sec, 95°C, 30 sec                                      |                                         |
|           | 10        |                                                                 | 94°C, 15 sec, 64°C, 30 sec, 68°C, 3 min |
|           |           |                                                                 | 94°C, 15 sec, 64°C, 30 sec, 68°C, 3 min |
|           |           |                                                                 | 94°C, 15 sec, 44°C, 30 sec, 68°C, 3 min |
|           | 1         | 68°C, 5 min                                                     |                                         |
| Tertiary  | 1         | 94°C, 30 sec, 95°C, 30 sec                                      |                                         |
|           | 10        |                                                                 | 94°C, 15 sec, 64°C, 30 sec, 68°C, 3 min |
|           |           |                                                                 | 94°C, 15 sec, 64°C, 30 sec, 68°C, 3 min |
|           |           |                                                                 | 94°C, 15 sec, 44°C, 30 sec, 68°C, 3 min |
|           | 1         | 68°C, 5 min                                                     |                                         |

**Supplemental Table 2. Primers Used in This Study**

| Name      | Sequence (5'→3')                                             | Usage                                                     |
|-----------|--------------------------------------------------------------|-----------------------------------------------------------|
| CTL1      | GGTTCCTATAGGGTTTCGCTCAT                                      | TAIL-PCR for the left border of pCAMBIA1300               |
| CTL2      | TGTTGAGCATATAAGAAACCCCTTAG                                   | TAIL-PCR for the left border of pCAMBIA1300               |
| CTL3      | AAAAATCCAGTACTAAAAATCCAGATCC                                 | TAIL-PCR for the left border of pCAMBIA1300               |
| CTR1      | CTGGCGTAATAGCGAAGAGG                                         | TAIL-PCR for the right border of pCAMBIA1300              |
| CTR2      | GATCGCCCTCCCAACAG                                            | TAIL-PCR for the right border of pCAMBIA1300              |
| CTR3      | CAGCCTGAATGGCGAATGCTA                                        | TAIL-PCR for the right border of pCAMBIA1300              |
| AD1       | NTCGA (G/C) T (A/T) T (G/C) G (A/T) GTT                      | arbitrary degenerate primer for TAIL-PCR                  |
| AD2       | NGTCGA (G/C) (A/T) GANA (A/T) GAA                            | arbitrary degenerate primer for TAIL-PCR                  |
| AD3       | (A/T) GTGNAG (A/T) ANCANAGA                                  | arbitrary degenerate primer for TAIL-PCR                  |
| PRO-L     | CACCTTCTCGGAAGGTCGCTAAATC                                    | Construction of entry clone containing NOP1 primer region |
| PRO-R2    | AATATTACCAATCACATCGACCATGT                                   | Construction of entry clone containing NOP1 primer region |
| gCDSL     | CACCGAGCGGACTGGTCTCTTAGACTTA                                 | Construction of entry clone containing NOP1 coding region |
| gCDSR-ns  | TTGACCGGTGACTCGC                                             | Construction of entry clone containing NOP1 coding region |
| L1        | TCATCAAAAACGTGACCATCG                                        | Check of expression and T-DNA insertion in NOP1           |
| R1        | CACTTTACCAGGCTTCGTC                                          | Check of expression and T-DNA insertion in NOP1           |
| MpEF1-L   | TCACTCTGGGTGTGAAGCAG                                         | Control of RT-PCR                                         |
| MpEF1-R   | GCCTCGAGTAAAGCTTCGTG                                         | Control of RT-PCR                                         |
| CDS-MBP-L | <u>AAGGATTT</u> CAGAA <u>TT</u> CGGAGGCAGCGGTGGGTCCATGGTCGAT | Cloning of NOP1 CDS into pMAL-c2 vector                   |
| CDS-MBP-R | <u>TTGCCTGCAGGTCGACT</u> ATTTGACCGGTGACTCGCC                 | Cloning of NOP1 CDS into pMAL-c2 vector                   |
| L45S-F    | GTACGAGGCGTTTCGTTTGCCCATCAACAAAAATGTGATGG                    | For introduction of a point mutation in the NOP1 CDS      |
| L45S-R    | CCATCACATTTTTTGTGTGATGGGCAAACGAACGCCTCGTAC                   | For introduction of a point mutation in the NOP1 CDS      |
| C83S-F    | GGAGAACAGGCCTGCAAGTAGCCCCATGACAGGGAAG                        | For introduction of a point mutation in the NOP1 CDS      |
| C83S-R    | CTTCCCTGTCATGGGGCTACTTGCAGGCCTGTTCTCC                        | For introduction of a point mutation in the NOP1 CDS      |
| P84A-F    | CAGGCCTGCAAGTTGCGCCATGACAGGGAAGACTTTGG                       | For introduction of a point mutation in the NOP1 CDS      |
| P84A-R    | CCAAAGTCTTCCCTGTCATGGCGCAACTTGCAGGCCTG                       | For introduction of a point mutation in the NOP1 CDS      |

Underlined bases indicate the homologous sequences for cloning into pMAL-c2 using In-fusion cloning kit.
